# Supplementary material for: Infective Endocarditis by Lactobacillus Species—A Narrative Review
Source: MDPI journal article supplement (doi:10.3390/antibiotics13010053), 2024-01-04
Supplement: s1 [file s1]

# Infective Endocarditis by *Lactobacillus* Species—A Narrative Review

Petros Ioannou <sup>1,\*</sup>, Afroditi Ziogou <sup>2</sup>, Ilias Giannakodimos <sup>2,†</sup>, Alexios Giannakodimos <sup>2,†</sup>, Stella Baliou <sup>1</sup> and George Samonis <sup>1,3,\*</sup>

<sup>1</sup> School of Medicine, University of Crete, 71003 Heraklion, Greece

<sup>2</sup> School of Medicine, National and Kapodistrian University of Athens, 11527 Athens, Greece; iliasgiannakodimos@gmail.com (I.G.)

<sup>3</sup> First Department of Medical Oncology, Metropolitan Hospital of Neon Faliron, 18547 Athens, Greece

\* Correspondence: p.ioannou@uoc.gr (P.I.); samonis@med.uoc.gr (G.S.)

† These authors contributed equally to this work.

**Table S1.** Characteristics of the included studies.

| Study                       | Number of patients | Age (years) | Gender             | Site of infection <i>n</i> (%) | Microbiology of infection <i>n</i> (%)                   | Treatment administered <i>n</i> (%)                                                                       | Infection outcomes <i>n</i> (%)                                                       |
|-----------------------------|--------------------|-------------|--------------------|--------------------------------|----------------------------------------------------------|-----------------------------------------------------------------------------------------------------------|---------------------------------------------------------------------------------------|
| Axelrod et al., 1973 [22]   | 1                  | 44          | Female             | NR 1 (100)                     | <i>L. plantarum</i> 1 (100)                              | Penicillin 1 (100)<br>Aminopenicillin 1 (100)<br>Tetracycline 1 (100)                                     | Clinical cure <sup>a</sup> 1 (100)<br>Deaths overall 0 (0)                            |
| Tenenbaum et al., 1975 [23] | 1                  | 63          | Male               | NR 1 (100)                     | <i>L. casei</i> 1 (100)                                  | Penicillin 1 (100)<br>Cephalosporin 1 (100)<br>Aminoglycoside 1 (100)                                     | Clinical cure 1 (100)<br>Deaths overall 0 (0)                                         |
| Rubenfeld et al., 1977 [24] | 1                  | 40          | Male               | MV 1 (100)                     | <i>Lactobacillus</i> spp. 1 (100)                        | Penicillin 1 (100)                                                                                        | Clinical cure 1 (100)<br>Deaths overall 0 (0)                                         |
| Bayer et al., 1978 [25]     | 3                  | 43, 48, 52  | 1 female<br>2 male | AoV 3 (100)                    | <i>L. plantarum</i> 2 (66.7)<br><i>L. casei</i> 1 (33.3) | Penicillin 2 (66.7)<br>Aminoglycoside 1 (33.3)<br>No antibiotics 1 (33.3)<br>Surgical management 2 (66.7) | Clinical cure 1 (33.3)<br>Deaths overall 2 (66.7)<br>Deaths due to infection 1 (33.3) |
| Jawetz et al., 1980 [26]    | 1                  | 7           | Female             | TrV 1 (100)                    | <i>L. rhamnosus</i> 1 (100)                              | Penicillin 1 (100)<br>Aminoglycoside 1 (100)                                                              | Clinical cure 1 (100)<br>Deaths overall 0 (0)                                         |
| Shinar et al., 1984 [27]    | 1                  | 30          | Male               | MV 1 (100)                     | <i>L. plantarum</i> 1 (100)                              | Penicillin 1 (100)<br>Macrolide 1 (100)<br>Rifampicin 1 (100)<br>Aminoglycoside 1 (100)                   | Clinical cure 1 (100)<br>Deaths overall 0 (0)                                         |

|                              |   |        |      |                          |                                                              |  |  |                             |                                 |
|------------------------------|---|--------|------|--------------------------|--------------------------------------------------------------|--|--|-----------------------------|---------------------------------|
|                              |   |        |      |                          |                                                              |  |  | Surgical management 1 (100) |                                 |
| Sussman et al., 1986 [28]    | 1 | 27     | Male | AoV 1 (100)              | <i>L. casei</i> 1 (100)                                      |  |  | Penicillin 1 (100)          | Clinical cure 1 (100)           |
|                              |   |        |      |                          |                                                              |  |  | Rifampicin 1 (100)          |                                 |
|                              |   |        |      |                          |                                                              |  |  | Aminoglycoside 1 (100)      | Deaths overall 0 (0)            |
|                              |   |        |      |                          |                                                              |  |  | Surgical management 1 (100) |                                 |
| Davies et al., 1986 [29]     | 2 | 40, 55 | Male | AoV 2 (100)<br>MV 1 (50) | <i>L. plantarum</i> 1 (50)<br><i>L. casei</i> 1 (50)         |  |  | Penicillin 1 (50)           | Clinical cure 1 (50)            |
|                              |   |        |      |                          |                                                              |  |  | Aminopenicillin 1 (50)      |                                 |
|                              |   |        |      |                          |                                                              |  |  | Aminoglycoside 2 (100)      | Deaths overall 1 (50)           |
|                              |   |        |      |                          |                                                              |  |  |                             |                                 |
| Fisher et al., 1988 [30]     | 1 | 42     | Male | AoV 1 (100)              | <i>L. salivarius</i> 1 (100)<br><i>L. salicinius</i> 1 (100) |  |  | Penicillin 1 (100)          | Clinical cure 1 (100)           |
|                              |   |        |      |                          |                                                              |  |  | Rifampicin 1 (100)          |                                 |
|                              |   |        |      |                          |                                                              |  |  |                             | Deaths overall 0 (0)            |
|                              |   |        |      |                          |                                                              |  |  |                             |                                 |
| Struve et al., 1988 [31]     | 1 | 69     | Male | MV 1 (100)               | <i>L. plantarum</i> 1 (100)                                  |  |  | Penicillin 1 (100)          | Clinical cure 1 (100)           |
|                              |   |        |      |                          |                                                              |  |  | Aminoglycoside 1 (100)      |                                 |
|                              |   |        |      |                          |                                                              |  |  |                             | Deaths overall 0 (0)            |
|                              |   |        |      |                          |                                                              |  |  |                             |                                 |
| Naude et al., 1988 [32]      | 1 | 66     | Male | MV 1 (100)               | <i>L. rhamnosus</i> 1 (100)                                  |  |  | Penicillin 1 (100)          | Clinical cure 0 (0)             |
|                              |   |        |      |                          |                                                              |  |  | Aminopenicillin 1 (100)     |                                 |
|                              |   |        |      |                          |                                                              |  |  | Aminoglycoside 1 (100)      | Deaths overall 1 (100)          |
|                              |   |        |      |                          |                                                              |  |  | Surgical management 1 (100) |                                 |
|                              |   |        |      |                          |                                                              |  |  |                             | Deaths due to IE 1 (100)        |
|                              |   |        |      |                          |                                                              |  |  |                             |                                 |
| Thangkhiew et al., 1988 [33] | 1 | 66     | Male | MV 1 (100)               | <i>L. plantarum</i> 1 (100)                                  |  |  | Penicillin 1 (100)          | Clinical cure 0 (0)             |
|                              |   |        |      |                          |                                                              |  |  | Aminopenicillin 1 (100)     |                                 |
|                              |   |        |      |                          |                                                              |  |  |                             | Deaths overall 1 (100)          |
|                              |   |        |      |                          |                                                              |  |  |                             |                                 |
|                              |   |        |      |                          |                                                              |  |  |                             | Deaths due to infection 1 (100) |
|                              |   |        |      |                          |                                                              |  |  |                             |                                 |
| Stulz et al., 1989 [34]      | 1 | 72     | Male | MV 1 (100)               | <i>Lactobacillus</i> spp. 1 (100)                            |  |  | Penicillin 1 (100)          | Clinical cure 1 (100)           |
|                              |   |        |      |                          |                                                              |  |  | Surgical management 1 (100) |                                 |
|                              |   |        |      |                          |                                                              |  |  |                             | Deaths overall 0 (0)            |
|                              |   |        |      |                          |                                                              |  |  |                             |                                 |
| Atkins et al., 1990 [35]     | 1 | 61     | Male | AoV 1 (100)              | <i>L. jensenii</i> 1 (100)                                   |  |  | Penicillin 1 (100)          | Clinical cure 1 (100)           |
|                              |   |        |      |                          |                                                              |  |  | Aminopenicillin 1 (100)     |                                 |
|                              |   |        |      |                          |                                                              |  |  | Aminoglycoside 1 (100)      | Deaths overall 0 (0)            |
|                              |   |        |      |                          |                                                              |  |  |                             |                                 |
| Chong et al., 1991 [36]      | 1 | 41     | Male | MV 1 (100)               | <i>L. casei</i> 1 (100)                                      |  |  | Aminopenicillin 1 (100)     | Clinical cure 1 (100)           |
|                              |   |        |      |                          |                                                              |  |  |                             |                                 |
|                              |   |        |      |                          |                                                              |  |  |                             | Deaths overall 0 (0)            |
|                              |   |        |      |                          |                                                              |  |  |                             |                                 |

|                              |   |        |        |                           |                                                                |                                                                                                                          |                                                                                  |
|------------------------------|---|--------|--------|---------------------------|----------------------------------------------------------------|--------------------------------------------------------------------------------------------------------------------------|----------------------------------------------------------------------------------|
| Griffiths et al., 1992 [37]  | 2 | 31, 45 | Male   | AoV 2 (100)               | <i>L. acidophilus</i> 1 (33.3)                                 | Penicillin 1 (50)                                                                                                        | Clinical cure 2 (100)                                                            |
|                              |   |        |        |                           | <i>L. rhamnosus</i> 1 (33.3)                                   | Aminopenicillin 1 (50)<br>Quinolone 1 (50)<br>Aminoglycoside 2 (100)<br>Surgical management 1 (50)                       | Deaths overall 0 (0)                                                             |
| Sloss et al., 1993 [38]      | 1 | 79     | Male   | NR 1 (100)                | <i>L. rhamnosus</i> 1 (100)                                    | Aminopenicillin 1 (100)<br>Aminoglycoside 1 (100)<br>Surgical management 1 (100)                                         | Clinical cure 1 (100)<br>Deaths overall 0 (0)                                    |
|                              |   |        |        |                           |                                                                |                                                                                                                          |                                                                                  |
| Olearchyk et al., 1993 [39]  | 1 | 69     | Male   | AoV 1 (100)<br>MV 1 (100) | <i>L. acidophilus</i> 1 (100)<br><i>L. acidophilus</i> 1 (100) | Penicillin 1 (100)<br>Aminoglycoside 1 (100)<br>Surgical management 1 (100)                                              | Clinical cure 1 (100)<br>Deaths overall 0 (0)                                    |
|                              |   |        |        |                           |                                                                |                                                                                                                          |                                                                                  |
| Puleo et al., 1994 [40]      | 1 | 21     | Female | PV 1 (100)                | <i>L. jensenii</i> 1 (100)                                     | Penicillin 1 (100)<br>Aminoglycoside 1 (100)                                                                             | Clinical cure 1 (100)<br>Deaths overall 0 (0)                                    |
|                              |   |        |        |                           |                                                                |                                                                                                                          |                                                                                  |
| Bessis et al., 1995 [41]     | 1 | 28     | Female | MV 1 (100)                | <i>L. acidophilus</i> 1 (100)                                  | Penicillin 1 (100)<br>Aminopenicillin 1 (100)<br>Rifampicin 1 (100)<br>Vancomycin 1 (100)<br>Surgical management 1 (100) | Clinical cure 1 (100)<br>Deaths overall 0 (0)                                    |
|                              |   |        |        |                           |                                                                |                                                                                                                          |                                                                                  |
| Jones et al., 1995 [42]      | 1 | NR     | NR     | NR 1 (100)                | <i>L. rhamnosus</i> 1 (100)                                    | Aminopenicillin 1 (100)<br>Macrolide 1 (100)<br>Aminoglycoside 1 (100)                                                   | Clinical cure 0 (0)<br>Deaths overall 1 (100)<br>Deaths due to infection 1 (100) |
|                              |   |        |        |                           |                                                                |                                                                                                                          |                                                                                  |
| Amrikachi et al., 1997 [43]  | 1 | 43     | Male   | MV 1 (100)                | <i>L. acidophilus</i> 1 (100)                                  | Aminopenicillin 1 (100)<br>Cephalosporin 1 (100)<br>Aminoglycoside 1 (100)                                               | Clinical cure 0 (0)<br>Deaths overall 1 (100)<br>Deaths due to infection 1 (100) |
|                              |   |        |        |                           |                                                                |                                                                                                                          |                                                                                  |
| Vaghijimal et al., 1997 [44] | 1 | 80     | Female | AoV 1 (100)<br>MV 1 (100) | <i>L. jensenii</i> 1 (100)                                     | Penicillin 1 (100)<br>Aminoglycoside 1 (100)                                                                             | Clinical cure 1 (100)<br>Deaths overall 0 (0)                                    |
|                              |   |        |        |                           |                                                                |                                                                                                                          |                                                                                  |

|                               |   |    |        |             |                                   |                                                                                                                              |                                               |
|-------------------------------|---|----|--------|-------------|-----------------------------------|------------------------------------------------------------------------------------------------------------------------------|-----------------------------------------------|
| Mitchell et al., 1999 [45]    | 1 | 72 | Male   | MV 1 (100)  | <i>L. curvatus</i> 1 (100)        | Penicillin 1 (100)<br>Aminoglycoside 1 (100)                                                                                 | Clinical cure 1 (100)<br>Deaths overall 0 (0) |
| Mackay et al., 1999 [46]      | 1 | 67 | Male   | MV 1 (100)  | <i>L. rhamnosus</i> 1 (100)       | Penicillin 1 (100)<br>Aminoglycoside 1 (100)                                                                                 | Clinical cure 1 (100)<br>Deaths overall 0 (0) |
| Avlami et al., 2001 [47]      | 1 | 65 | Male   | AoV 1 (100) | <i>L. rhamnosus</i> 1 (100)       | Penicillin 1 (100)<br>Cephalosporin 1 (100)<br>Quinolone 1 (100)<br>Clindamycin 1 (100)<br>Aminoglycoside 1 (100)            | Clinical cure 1 (100)<br>Deaths overall 0 (0) |
| Presterl et al., 2001 [48]    | 1 | 23 | Male   | AoV 1 (100) | <i>L. casei</i> 1 (100)           | Penicillin 1 (100)<br>Aminopenicillin 1 (100)<br>Surgical management 1 (100)                                                 | Clinical cure 1 (100)<br>Deaths overall 0 (0) |
| Schoevaerdt et al., 2002 [49] | 1 | 82 | Male   | AoV 1 (100) | <i>Lactobacillus</i> spp. 1 (100) | Penicillin 1 (100)<br>Clindamycin 1 (100)<br>Clindamycin 1 (100)<br>Aminoglycoside 1 (100)                                   | Clinical cure 1 (100)<br>Deaths overall 0 (0) |
| Wallet et al., 2002 [50]      | 1 | 73 | Male   | MV 1 (100)  | <i>L. rhamnosus</i> 1 (100)       | Aminopenicillin 1 (100)<br>Vancomycin 1 (100)<br>Rifampicin 1 (100)<br>Aminoglycoside 1 (100)<br>Surgical management 1 (100) | Clinical cure 1 (100)<br>Deaths overall 0 (0) |
| Beldner et al., 2002 [51]     | 1 | 31 | Female | MV 1 (100)  | <i>Lactobacillus</i> spp. 1 (100) | Penicillin 1 (100)<br>Aminoglycoside 1 (100)<br>Surgical management 1 (100)                                                  | Clinical cure 1 (100)<br>Deaths overall 0 (0) |
| Soleman et al., 2003 [52]     | 1 | 75 | Female | AoV 1 (100) | <i>L. paracasei</i> 1 (100)       | Penicillin 1 (100)<br>Aminoglycoside 1 (100)                                                                                 | Clinical cure 1 (100)<br>Deaths overall 0 (0) |
| Ze-Ze et al., 2004 [53]       | 1 | 53 | Male   | AoV 1 (100) | <i>L. acidophilus</i> 1 (100)     | Antipseudomonal penicillin 1 (100)<br>Tetracycline 1 (100)<br>Aminoglycoside 1 (100)<br>Surgical management 1 (100)          | Clinical cure 1 (100)<br>Deaths overall 0 (0) |
| Khan et al., 2005 [54]        | 1 | 16 | Female | MV 1 (100)  | <i>L. jensenii</i> 1 (100)        | Aminopenicillin 1 (100)                                                                                                      | Clinical cure 1 (100)                         |

|                            |   |    |        |             |                                   |                                                                                                                        |                                                                                  |
|----------------------------|---|----|--------|-------------|-----------------------------------|------------------------------------------------------------------------------------------------------------------------|----------------------------------------------------------------------------------|
|                            |   |    |        |             |                                   | Antipseudomonal penicillin 1 (100)                                                                                     | Deaths overall 0 (0)                                                             |
|                            |   |    |        |             |                                   | Aminoglycoside 1 (100)                                                                                                 |                                                                                  |
| Makaryus et al., 2005 [55] | 1 | 63 | Female | MV 1 (100)  | <i>L. acidophilus</i> 1 (100)     | Aminopenicillin 1 (100)<br>Cephalosporin 1 (100)<br>Carbapenem 1 (100)<br>Vancomycin 1 (100)<br>Macrolide 1 (100)      | Clinical cure 1 (100)<br>Deaths overall 0 (0)                                    |
| Salvana et al., 2006 [56]  | 1 | 62 | Female | NR 1 (100)  | <i>L. acidophilus</i> 1 (100)     | Penicillin 1 (100)<br>Aminoglycoside 1 (100)                                                                           | Clinical cure 1 (100)<br>Deaths overall 0 (0)                                    |
| See et al., 2006 [57]      | 1 | 42 | Male   | MV 1 (100)  | <i>L. casei</i> 1 (100)           | Aminopenicillin 1 (100)<br>Aminoglycoside 1 (100)<br>Surgical management 1 (100)                                       | Clinical cure 1 (100)<br>Deaths overall 0 (0)                                    |
| Khasnis et al., 2006 [58]  | 1 | 42 | Male   | AoV 1 (100) | <i>L. casei</i> 1 (100)           | Penicillin 1 (100)<br>Vancomycin 1 (100)<br>Quinolone 1 (100)<br>Aminoglycoside 1 (100)<br>Surgical management 1 (100) | Clinical cure 1 (100)<br>Deaths overall 0 (0)                                    |
| Yagi et al., 2008 [59]     | 1 | 42 | Male   | AoV 1 (100) | <i>Lactobacillus</i> spp. 1 (100) | Penicillin 1 (100)<br>Aminoglycoside 1 (100)<br>Surgical management 1 (100)                                            | Clinical cure 1 (100)<br>Deaths overall 0 (0)                                    |
| Wolz et al., 2008 [60]     | 1 | 69 | Male   | NR 1 (100)  | <i>L. rhamnosus</i> 1 (100)       | NR 1 (100)                                                                                                             | Clinical cure 0 (0)<br>Deaths overall 1 (100)<br>Deaths due to infection 1 (100) |
| Fradiani et al., 2010 [61] | 1 | 47 | Female | MV 1 (100)  | <i>L. jensenii</i> 1 (100)        | Penicillin 1 (100)<br>Aminoglycoside 1 (100)                                                                           | Clinical cure 1 (100)<br>Deaths overall 0 (0)                                    |
| Arshad et al., 2010 [62]   | 1 | 64 | Male   | AoV 1 (100) | <i>L. acidophilus</i> 1 (100)     | Penicillin 1 (100)<br>Aminoglycoside 1 (100)                                                                           | Clinical cure 0 (0)<br>Deaths overall 1 (100)                                    |

|                                 |   |    |        |             |                                   |                                                                                                                                          | Deaths due to infection 1 (100)               |
|---------------------------------|---|----|--------|-------------|-----------------------------------|------------------------------------------------------------------------------------------------------------------------------------------|-----------------------------------------------|
| Nishijima et al., 2012 [63]     | 1 | 28 | Female | MV 1 (100)  | <i>Lactobacillus</i> spp. 1 (100) | Penicillin 1 (100)<br>Clindamycin 1 (100)                                                                                                | Clinical cure 1 (100)<br>Deaths overall 0 (0) |
| Suarez-Garcia et al., 2012 [64] | 1 | 27 | Female | AoV 1 (100) | <i>L. jensenii</i> 1 (100)        | Penicillin 1 (100)<br>Cephalosporin 1 (100)<br>Aminoglycoside 1 (100)<br>Surgical management 1 (100)                                     | Clinical cure 1 (100)<br>Deaths overall 0 (0) |
| Walker et al., 2013 [65]        | 1 | 71 | Male   | AoV 1 (100) | <i>L. casei</i> 1 (100)           | Penicillin 1 (100)<br>Vancomycin 1 (100)<br>Aminoglycoside 1 (100)<br>Surgical management 1 (100)                                        | Clinical cure 1 (100)<br>Deaths overall 0 (0) |
| Franko et al., 2013 [66]        | 1 | 77 | Male   | MV 1 (100)  | <i>L. paracasei</i> 1 (100)       | Aminopenicillin 1 (100)<br>Aminoglycoside 1 (100)<br>Surgical management 1 (100)                                                         | Clinical cure 1 (100)<br>Deaths overall 0 (0) |
| Botros et al., 2014 [67]        | 1 | 17 | Female | PV 1 (100)  | <i>Lactobacillus</i> spp. 1 (100) | Penicillin 1 (100)<br>Cephalosporin 1 (100)<br>Clindamycin 1 (100)<br>Aminoglycoside 1 (100)                                             | Clinical cure 1 (100)<br>Deaths overall 0 (0) |
| Marciniak et al., 2014 [68]     | 1 | 31 | Female | AoV 1 (100) | <i>L. jensenii</i> 1 (100)        | Teicoplanin 1 (100)<br>Rifampicin 1 (100)<br>Surgical management 1 (100)                                                                 | Clinical cure 1 (100)<br>Deaths overall 0 (0) |
| Patnaik et al., 2015 [69]       | 1 | 56 | Male   | AoV 1 (100) | <i>L. jensenii</i> 1 (100)        | Penicillin 1 (100)<br>Aminopenicillin 1 (100)<br>Antipseudomonal penicillin 1 (100)<br>Vancomycin 1 (100)<br>Surgical management 1 (100) | Clinical cure 1 (100)<br>Deaths overall 0 (0) |
| Gupta et al., 2015 [70]         | 1 | 65 | Male   | MV 1 (100)  | <i>Lactobacillus</i> spp. 1 (100) | NR 1 (100)<br>Surgical management 1 (100)                                                                                                | Clinical cure 1 (100)<br>Deaths overall 0 (0) |
| Felekos et al., 2016 [71]       | 1 | 74 | Male   | MV 1 (100)  | <i>L. rhamnosus</i> 1 (100)       | Penicillin 1 (100)<br>Cephalosporin 1 (100)                                                                                              | Clinical cure 1 (100)                         |

|                               |   |    |        |                           |                                   |                                                                                                                                         |                                                                                |
|-------------------------------|---|----|--------|---------------------------|-----------------------------------|-----------------------------------------------------------------------------------------------------------------------------------------|--------------------------------------------------------------------------------|
|                               |   |    |        |                           |                                   | Aminoglycoside 1 (100)                                                                                                                  | Deaths overall 0 (0)                                                           |
|                               |   |    |        |                           |                                   | Surgical management 1 (100)                                                                                                             |                                                                                |
| Kato et al., 2016 [72]        | 1 | 78 | Male   | AoV 1 (100)               | <i>L. paracasei</i> 1 (100)       | Clindamycin 1 (100)<br>Surgical management 1 (100)                                                                                      | Clinical cure 1 (100)<br>Deaths overall 0 (0)                                  |
| Encarnacion et al., 2016 [73] | 1 | 48 | Male   | AoV 1 (100)               | <i>L. acidophilus</i> 1 (100)     | Penicillin 1 (100)<br>Antipseudomonal penicillin 1 (100)<br>Vancomycin 1 (100)<br>Daptomycin 1 (100)<br>Surgical management 1 (100)     | Clinical cure 1 (100)<br>Deaths overall 0 (0)                                  |
| Passera et al., 2016 [74]     | 1 | 2  | NR     | NR 1 (100)                | <i>L. rhamnosus</i> 1 (100)       | Cephalosporin 1 (100)<br>Vancomycin 1 (100)<br>Quinolone 1 (100)                                                                        | Clinical cure 0 (0)<br>Deaths overall 1 (100)<br>Deaths due to infection 0 (0) |
| Stroupe et al., 2017 [75]     | 1 | 51 | Male   | MV 1 (100)                | <i>L. zeae</i> 1 (100)            | Penicillin 1 (100)<br>Antipseudomonal penicillin 1 (100)<br>Vancomycin 1 (100)<br>Aminoglycoside 1 (100)<br>Surgical management 1 (100) | Clinical cure 1 (100)<br>Deaths overall 0 (0)                                  |
| Aaron et al., 2017 [76]       | 1 | 80 | Male   | AoV 1 (100)<br>MV 1 (100) | <i>L. rhamnosus</i> 1 (100)       | Penicillin 1 (100)<br>Aminopenicillin 1 (100)<br>Vancomycin 1 (100)<br>Aminoglycoside 1 (100)<br>Surgical management 1 (100)            | Clinical cure 1 (100)<br>Deaths overall 0 (0)                                  |
| Groga-Bada et al., 2018 [77]  | 1 | 81 | Female | MV 1 (100)                | <i>Lactobacillus</i> spp. 1 (100) | Aminopenicillin 1 (100)<br>Antipseudomonal penicillin 1 (100)<br>Aminoglycoside 1 (100)<br>Surgical management 1 (100)                  | Clinical cure 1 (100)<br>Deaths overall 0 (0)                                  |
| Naqvi et al., 2018 [78]       | 1 | 36 | Female | AoV 1 (100)               | <i>L. rhamnosus</i> 1 (100)       | Penicillin 1 (100)<br>Vancomycin 1 (100)<br>Aminoglycoside 1 (100)                                                                      | Clinical cure 0 (0)                                                            |

|                              |   |    |        |                           |                                      | Surgical<br>management 1 (100)                                                                                   | Deaths<br>overall 1<br>(100)<br>Deaths due<br>to infection 1<br>(100)                           |
|------------------------------|---|----|--------|---------------------------|--------------------------------------|------------------------------------------------------------------------------------------------------------------|-------------------------------------------------------------------------------------------------|
| Lim et al., 2018 [79]        | 1 | 85 | Male   | MV 1 (100)                | <i>L. garvieae</i> 1<br>(100)        | Cephalosporin 1<br>(100)                                                                                         | Clinical cure<br>1 (100)<br>Deaths<br>overall 0 (0)                                             |
| Boumis et al., 2018<br>[80]  | 1 | 65 | NR     | AoV 1 (100)               | <i>L. rhamnosus</i> 1<br>(100)       | Aminopenicillin 1<br>(100)<br>Cephalosporin 1<br>(100)<br>Aminoglycoside 1<br>(100)                              | Clinical cure<br>1 (100)<br>Deaths<br>overall 0 (0)                                             |
| Ajam et al., 2019 [81]       | 1 | 75 | Female | AoV 1 (100)               | <i>L. paracasei</i> 1<br>(100)       | Penicillin 1 (100)<br>Cephalosporin 1<br>(100)<br>Vancomycin 1 (100)<br>Aminoglycoside 1<br>(100)                | Clinical cure<br>0 (0)<br>Deaths<br>overall 1<br>(100)<br>Deaths due<br>to infection 0<br>(0)   |
| Osman et al., 2019<br>[82]   | 1 | 65 | Male   | AoV 1 (100)               | <i>L. paracasei</i> 1<br>(100)       | Penicillin 1 (100)<br>Cephalosporin 1<br>(100)<br>Vancomycin 1 (100)<br>Aminoglycoside 1<br>(100)                | Clinical cure<br>1 (100)<br>Deaths<br>overall 0 (0)                                             |
| Agrawal et al., 2020<br>[83] | 1 | 83 | Male   | AoV 1 (100)               | <i>Lactobacillus</i><br>spp. 1 (100) | Aminopenicillin 1<br>(100)<br>Clindamycin 1 (100)<br>Aminoglycoside 1<br>(100)<br>Surgical<br>management 1 (100) | Clinical cure<br>0 (0)<br>Deaths<br>overall 1<br>(100)<br>Deaths due<br>to infection 1<br>(100) |
| Antoun et al., 2020<br>[84]  | 1 | 40 | Male   | AoV 1 (100)               | <i>L. rhamnosus</i> 1<br>(100)       | Cephalosporin 1<br>(100)<br>Carbapenem 1 (100)<br>Vancomycin 1 (100)<br>Surgical<br>management 1 (100)           | Clinical cure<br>1 (100)<br>Deaths<br>overall 0 (0)                                             |
| Pasala et al., 2020<br>[85]  | 1 | 50 | Male   | AoV 1 (100)<br>MV 1 (100) | <i>L. rhamnosus</i> 1<br>(100)       | Aminopenicillin 1<br>(100)<br>Cephalosporin 1<br>(100)<br>Aminoglycoside 1<br>(100)                              | Clinical cure<br>1 (100)<br>Deaths<br>overall 0 (0)                                             |



|                             |   |        |                    |             |                                   |                                                                                                                            |                                               |
|-----------------------------|---|--------|--------------------|-------------|-----------------------------------|----------------------------------------------------------------------------------------------------------------------------|-----------------------------------------------|
|                             |   |        |                    |             |                                   | Surgical management 1 (100)                                                                                                |                                               |
| Chukwurah et al., 2020 [86] | 1 | 60     | Male               | AoV 1 (100) | <i>L. acidophilus</i> 1 (100)     | Antipseudomonal penicillin 1 (100)<br>Co-trimoxazole 1 (100)<br>Surgical management 1 (100)                                | Clinical cure 1 (100)<br>Deaths overall 0 (0) |
| Campagne et al., 2020 [87]  | 1 | 57     | Male               | MV 1 (100)  | <i>L. rhamnosus</i> 1 (100)       | Aminopenicillin 1 (100)<br>Rifampicin 1 (100)<br>Aminoglycoside 1 (100)                                                    | Clinical cure 1 (100)<br>Deaths overall 0 (0) |
| Tavernese et al., 2020 [88] | 1 | 48     | Male               | AoV 1 (100) | <i>L. plantarum</i> 1 (100)       | Penicillin 1 (100)<br>Aminopenicillin 1 (100)<br>Aminoglycoside 1 (100)<br>Surgical management 1 (100)                     | Clinical cure 1 (100)<br>Deaths overall 0 (0) |
| Minto et al., 2020 [89]     | 1 | 57     | Female             | AoV 1 (100) | <i>L. jensenii</i> 1 (100)        | Aminopenicillin 1 (100)<br>Macrolide 1 (100)<br>Surgical management 1 (100)                                                | Clinical cure 1 (100)<br>Deaths overall 0 (0) |
| Ozer et al., 2020 [90]      | 1 | 42     | Male               | AoV 1 (100) | <i>L. acidophilus</i> 1 (100)     | Penicillin 1 (100)<br>Cephalosporin 1 (100)<br>Vancomycin 1 (100)<br>Clindamycin 1 (100)<br>Surgical management 1 (100)    | Clinical cure 1 (100)<br>Deaths overall 0 (0) |
| Campbell et al., 2020 [91]  | 1 | 45     | Male               | MV 1 (100)  | <i>L. paracasei</i> 1 (100)       | Penicillin 1 (100)<br>Cephalosporin 1 (100)<br>Vancomycin 1 (100)<br>Aminoglycoside 1 (100)<br>Surgical management 1 (100) | Clinical cure 1 (100)<br>Deaths overall 0 (0) |
| Bergas et al., 2021 [92]    | 2 | 81, 83 | 1 female<br>1 male | MV 1 (50)   | <i>L. rhamnosus</i> 2 (100)       | Penicillin 1 (50)<br>Aminopenicillin 1 (50)<br>Aminoglycoside 1 (50)                                                       | Clinical cure 2 (100)<br>Deaths overall 0 (0) |
| Pischel et al., 2021 [93]   | 1 | 67     | Male               | MV 1 (100)  | <i>Lactobacillus</i> spp. 1 (100) | Penicillin 1 (100)<br>Aminopenicillin 1 (100)<br>Surgical management 1 (100)                                               | Clinical cure 1 (100)<br>Deaths overall 0 (0) |

|                                     |   |    |        |                             |                                                                                  |                                                                                                                             |                                                                                  |
|-------------------------------------|---|----|--------|-----------------------------|----------------------------------------------------------------------------------|-----------------------------------------------------------------------------------------------------------------------------|----------------------------------------------------------------------------------|
| Udongwo et al., 2022 [94]           | 1 | 77 | Male   | Left pulmonary vein 1 (100) | <i>Lactobacillus</i> spp. 1 (100)                                                | NR 1 (100)<br>Surgical management 1 (100)                                                                                   | Clinical cure 0 (0)<br>Deaths overall 1 (100)<br>Deaths due to infection 1 (100) |
| Grazioli-Gauthier et al., 2022 [20] | 1 | 40 | Male   | MV 1 (100)                  | <i>L. jensenii</i> 1 (100)                                                       | Aminopenicillin 1 (100)<br>Aminoglycoside 1 (100)<br>Surgical management 1 (100)                                            | Clinical cure 1 (100)<br>Deaths overall 0 (0)                                    |
| Bapna et al., 2023 [95]             | 1 | 22 | Female | MV 1 (100)                  | <i>L. jensenii</i> 1 (100)                                                       | Carbapenem 1 (100)<br>Vancomycin 1 (100)<br>Surgical management 1 (100)                                                     | Clinical cure 1 (100)<br>Deaths overall 0 (0)                                    |
| Rahman et al., 2023 [96]            | 1 | 71 | Female | AoV 1 (100)<br>MV 1 (100)   | <i>L. casei</i> 1 (100)                                                          | Aminopenicillin 1 (100)<br>Daptomycin 1 (100)<br>Surgical management 1 (100)                                                | Clinical cure 1 (100)<br>Deaths overall 0 (0)                                    |
| DeMarco et al., 2023 [97]           | 1 | 61 | Female | TrV 1 (100)<br>CIED 1 (100) | <i>L. casei</i> 1 (100)<br><i>L. paracasei</i> 1 (100)<br><i>L. zeae</i> 1 (100) | Aminopenicillin 1 (100)<br>Carbapenem 1 (100)<br>Quinolone 1 (100)<br>Aminoglycoside 1 (100)<br>Surgical management 1 (100) | Clinical cure 1 (100)<br>Deaths overall 0 (0)                                    |

<sup>a</sup> Defined as the clinical resolution of the infection as a result of treatment. AoV: aortic valve; CIED: cardiac implantable electronic device; MV: mitral valve; PV: pulmonary valve TrV: tricuspid valve.

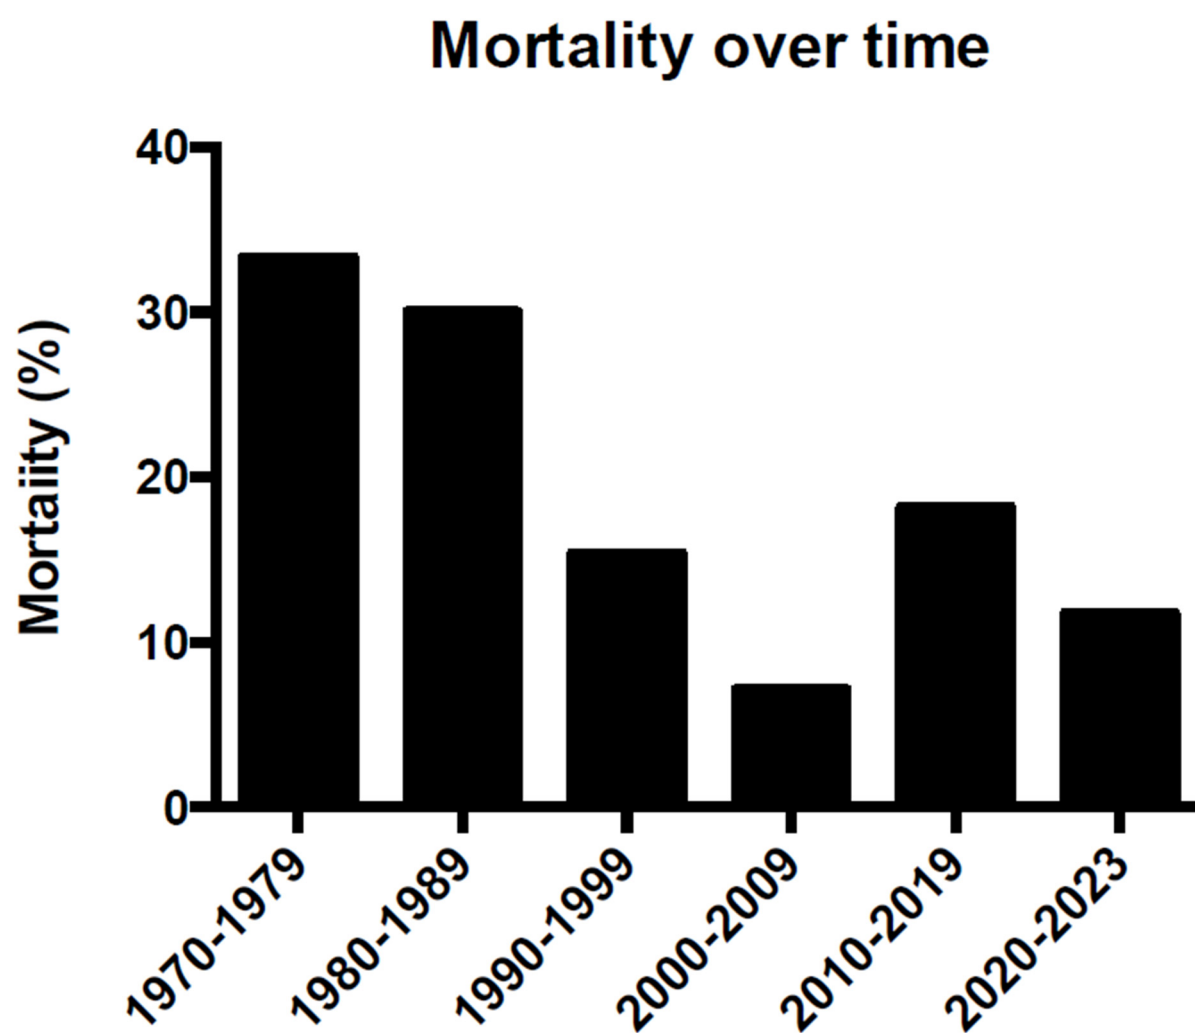

Figure S1. Overall mortality of patients with infective endocarditis by *Lactobacillus* species over time.
